# Supplementary material
Source: PubMed Central journal article supplement (PMC2832997)

## SUPPLEMENTAL FIGURE LEGENDS

Figure S1. Analysis of *arc40-118* temperature sensitivity. (A) *ARC40* and *arc40-118* strains were grown in liquid medium, serially diluted, plated on YPD, and grown for two days at 25, 34, and 37°C. (B) The same cells were grown to log phase at 25°C in YPD medium, grown for an additional 4 hr at 25 or 37°C, then fixed and stained with alexa-488 phalloidin and imaged.

Figure S2. Complementation analysis of *arc40-139*, *arc40-141*, and *arc40-140* alleles. Haploid strains with integrated lethal *arc40* alleles covered by a *URA3*-marked *ARC40* plasmid were crossed to generate heterozygous diploid strains of the indicated genotypes. The diploids were plated on synthetic complete media, -uracil, or 5-FOA containing media, and grown for 3 days at 25°C.

Figure S3. Actin nucleation activities of wild type and *arc40-140* Arp2/3 complexes. (A) Actin assembly reactions containing 2µM monomeric rabbit muscle actin (5% pyrene labeled) and variable concentrations of wild type (blue) or mutant (red) Arp2/3 complex and 10nM Las17. (B) Actin assembly reactions containing 1 µM monomeric yeast actin (plus 5% pyrene labeled RMA), 10nM Las17/WASp, and variable concentrations of wild type (blue) or mutant (red) Arp2/3 complex.

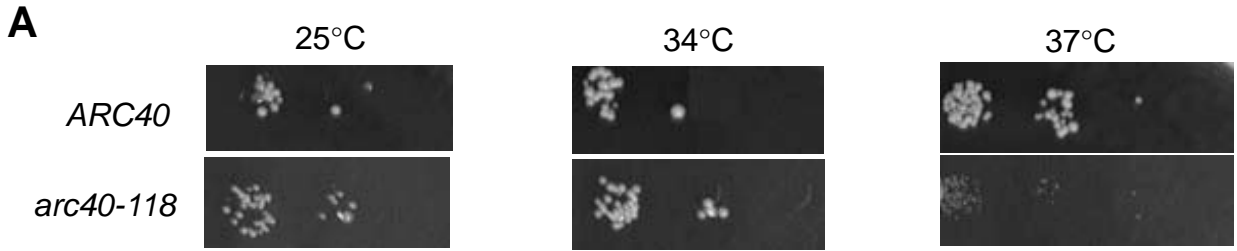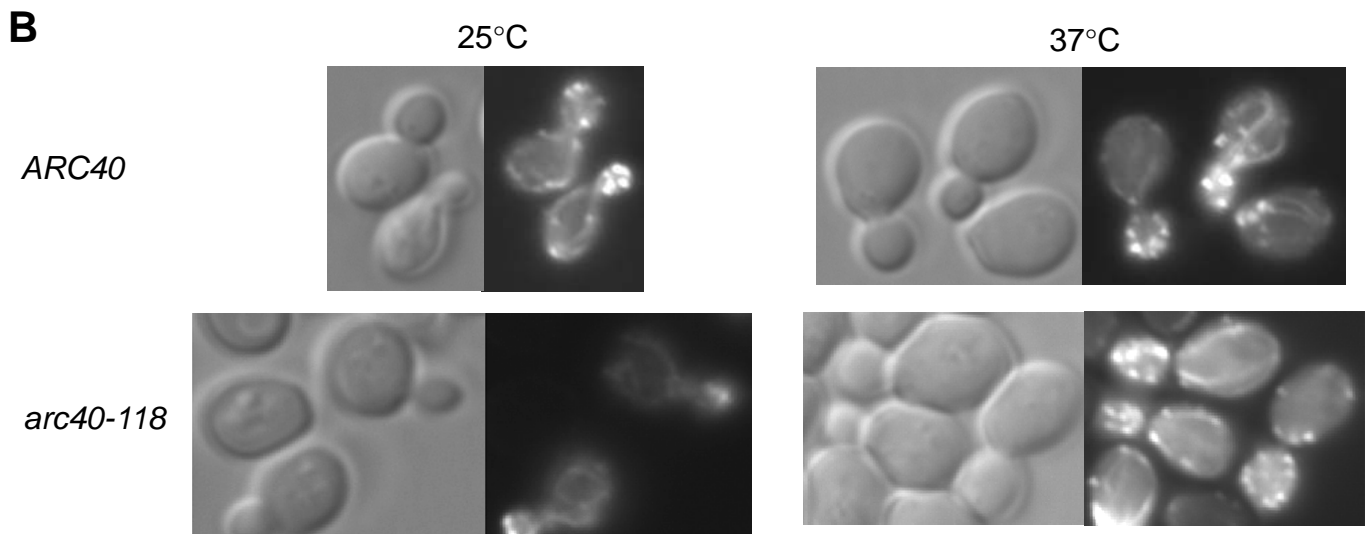

*arc40-139* *arc40-139* *arc40-140*  
*arc40-140* *arc40-141* *arc40-141*

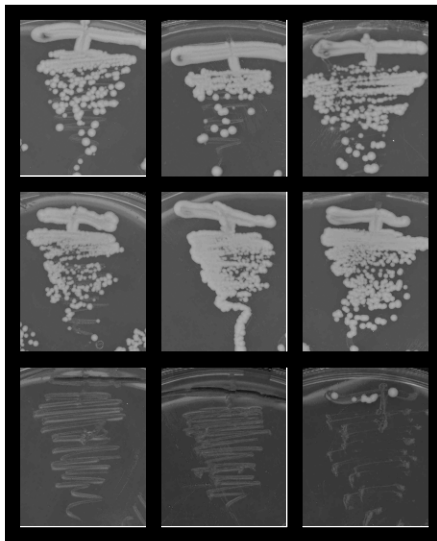

Synthetic complete

Synthetic complete  
without uracil

Synthetic complete  
with 5-FOA

Figure S3 (Balcer et al.)

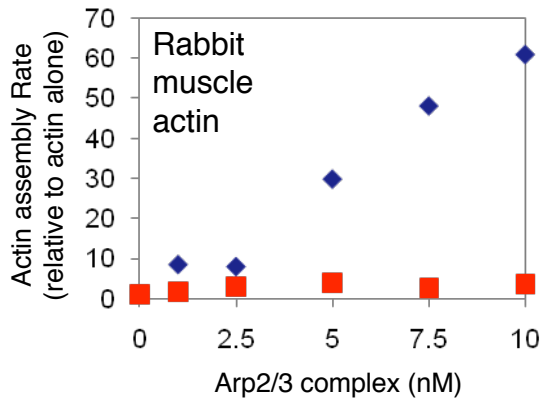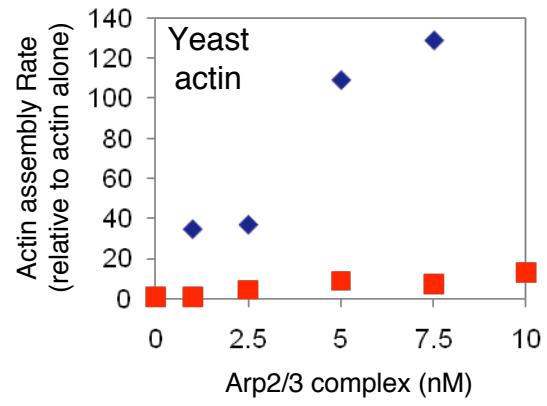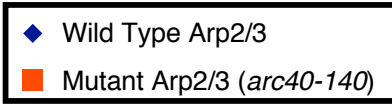

Supplement: supp_M109.054957_jbc.M109.054957-1.pdf [file supp_M109.054957_jbc.M109.054957-1.pdf]
